# Supplementary material
Source: PubMed Central journal article supplement (PMC5803186)
Supplement: NIHMS938381-supplement-supplement_1.pdf [file NIHMS938381-supplement-supplement_1.pdf]

**Supplementary Table 1.** Most Common Procedures Performed on the Same Day as Colectomy

| Description                                  | Code  | n       | % of Category | % of Total | Mortality rate, % |
|----------------------------------------------|-------|---------|---------------|------------|-------------------|
| All procedures (ANY)                         |       | 160,990 | 100.0         | 74.9       | 6.2               |
| Other lysis of peritoneal adhesions          | 54.59 | 24,270  | 15.1          | 11.3       | 6.1               |
| Colostomy NOS                                | 46.10 | 20,478  | 12.7          | 9.5        | 10.2              |
| Small to large bowel anastomosis NEC         | 45.93 | 18,534  | 11.5          | 8.6        | 4.1               |
| Transfusion of packed cells                  | 99.04 | 15,592  | 9.7           | 7.3        | 14.0              |
| Ureteral catheterization                     | 59.8  | 14,469  | 9.0           | 6.7        | 1.3               |
| Large to large bowel anastomosis             | 45.94 | 13,366  | 8.3           | 6.2        | 2.1               |
| Venous catheterization NEC                   | 38.93 | 11,303  | 7.0           | 5.3        | 16.3              |
| Partial small bowel resection NEC            | 45.62 | 9,774   | 6.1           | 4.5        | 11.8              |
| Excision or destruction of peritoneal tissue | 54.4  | 9,665   | 6.0           | 4.5        | 4.8               |
| Insertion of endotracheal tube               | 96.04 | 8,150   | 5.1           | 3.8        | 30.2              |
| Surgical procedures (SURG)                   |       | 149,437 | 100.0         | 69.5       | 6.1               |
| Other lysis of peritoneal adhesions          | 54.59 | 24,270  | 16.2          | 11.3       | 6.1               |
| Colostomy NOS                                | 46.10 | 20,478  | 13.7          | 9.5        | 10.2              |
| Small to large bowel anastomosis NEC         | 45.93 | 18,534  | 12.4          | 8.6        | 4.1               |
| Large to large bowel anastomosis             | 45.94 | 13,366  | 8.9           | 6.2        | 2.1               |
| Partial small bowel resection NEC            | 45.62 | 9,774   | 6.5           | 4.5        | 11.8              |
| Excision or destruction of peritoneal tissue | 54.4  | 9,665   | 6.5           | 4.5        | 4.8               |
| Laparoscopic lysis of peritoneal adhesions   | 54.51 | 7,879   | 5.3           | 3.7        | 1.1               |
| Ileostomy NOS                                | 46.20 | 7,378   | 4.9           | 3.4        | 22.2              |
| Closure of large bowel stoma                 | 46.52 | 7,372   | 4.9           | 3.4        | 1.7               |
| Temporary colostomy                          | 46.11 | 6,581   | 4.4           | 3.1        | 7.5               |
| Nonsurgical procedures (NONSURG)             |       | 67,975  | 100.0         | 31.6       | 9.3               |
| Transfusion of packed cells                  | 99.04 | 15,592  | 22.9          | 7.3        | 14.0              |
| Ureteral catheterization                     | 59.8  | 14,469  | 21.3          | 6.7        | 1.3               |
| Venous catheterization NEC                   | 38.93 | 11,303  | 16.6          | 5.3        | 16.3              |
| Insertion of endotracheal tube               | 96.04 | 8,150   | 12.0          | 3.8        | 30.2              |
| Rigid proctosigmoidoscopy                    | 48.23 | 6,185   | 9.1           | 2.9        | 1.6               |
| Cystoscopy NEC                               | 57.32 | 4,637   | 6.8           | 2.2        | 1.5               |
| Transfusion of serum NEC                     | 99.07 | 4,633   | 6.8           | 2.2        | 25.4              |
| Application of adhesion barrier substance    | 99.77 | 4,015   | 5.9           | 1.9        | 2.7               |
| Injection or infusion NEC                    | 99.29 | 2,916   | 4.3           | 1.4        | 2.9               |
| Injection of antibiotic                      | 99.21 | 2,706   | 4.0           | 1.3        | 5.5               |
| Part of planned colon operation (COLON)      |       | 78,664  | 100.0         | 36.6       | 8.2               |
| Colostomy NOS                                | 46.10 | 20,478  | 18.5          | 9.5        | 10.2              |
| Small to large bowel anastomosis NEC         | 45.93 | 18,534  | 16.8          | 8.6        | 4.1               |
| Large to large bowel anastomosis             | 45.94 | 13,366  | 12.1          | 6.2        | 2.1               |
| Ileostomy NOS                                | 46.20 | 7,378   | 6.7           | 3.4        | 22.2              |
| Temporary colostomy                          | 46.11 | 6,581   | 6.0           | 3.1        | 7.5               |
| Permanent ileostomy NEC                      | 46.23 | 3,419   | 3.1           | 1.6        | 18.5              |
| Rectal resection NEC                         | 48.69 | 2,867   | 2.6           | 1.3        | 3.7               |
| Permanent colostomy                          | 46.13 | 2,439   | 2.2           | 1.1        | 13.9              |
| Intestinal anastomosis NOS                   | 45.90 | 1,734   | 1.6           | 0.8        | 3.7               |
| Anterior rectal resection NEC                | 48.63 | 1,591   | 1.4           | 0.7        | 1.8               |
| Abdominal procedures (ABDOMEN)               |       | 110,570 | 100.0         | 51.4       | 5.4               |
| Other lysis of peritoneal adhesions          | 54.59 | 24,270  | 21.9          | 11.3       | 6.1               |
| Partial small bowel resection NEC            | 45.62 | 9,774   | 8.8           | 4.5        | 11.8              |
| Excision or destruction of peritoneal tissue | 54.4  | 9,665   | 8.7           | 4.5        | 4.8               |

(Continued)

**Supplementary Table 1.** Continued

| Description                                | Code  | n      | % of Category | % of Total | Mortality rate, % |
|--------------------------------------------|-------|--------|---------------|------------|-------------------|
| Laparoscopic lysis of peritoneal adhesions | 54.51 | 7,879  | 7.1           | 3.7        | 1.1               |
| Closure of large bowel stoma               | 46.52 | 7,372  | 6.7           | 3.4        | 1.7               |
| Other incidental appendectomy              | 47.19 | 6,350  | 5.7           | 3.0        | 3.6               |
| Laparoscopy                                | 54.21 | 4,516  | 4.1           | 2.1        | 2.1               |
| Other appendectomy                         | 47.09 | 4,421  | 4.0           | 2.1        | 2.0               |
| Cholecystectomy                            | 51.22 | 4,380  | 4.0           | 2.0        | 11.2              |
| Other removal of both ovaries and tubes    | 65.61 | 3,868  | 3.5           | 1.8        | 2.4               |
| Other procedures (OTHER)                   |       | 73,802 | 100.0         | 34.3       | 9.0               |
| Transfusion of packed cells                | 99.04 | 15,592 | 21.1          | 7.3        | 14.0              |
| Ureteral catheterization                   | 59.8  | 14,469 | 19.6          | 6.7        | 1.3               |
| Venous catheterization NEC                 | 38.93 | 11,303 | 15.3          | 5.3        | 16.3              |
| Insertion of endotracheal tube             | 96.04 | 8,150  | 11.0          | 3.8        | 30.2              |
| Rigid proctosigmoidoscopy                  | 48.23 | 6,185  | 8.4           | 2.9        | 1.6               |
| Cystoscopy NEC                             | 57.32 | 4,637  | 6.3           | 2.2        | 1.5               |
| Transfusion of serum NEC                   | 99.07 | 4,633  | 6.3           | 2.2        | 25.4              |
| Application of adhesion barrier substance  | 99.77 | 4,015  | 5.4           | 1.9        | 2.7               |
| Injection or infusion NEC                  | 99.29 | 2,916  | 4.0           | 1.4        | 2.9               |
| Injection of antibiotic                    | 99.21 | 2,706  | 3.7           | 1.3        | 5.5               |

Note that the categories do not form distinct groups, as patients who had more than one additional procedure could be included in multiple categories. NEC, not elsewhere classified (procedure did not fit any specifically defined ICD-9 codes); NOS, not otherwise specified (record did not contain adequate information to assign a specific code).
